# Supplementary material for: Evaluating the Accuracy of the QCEIMS Approach for Computational Prediction of Electron Ionization Mass Spectra of Purines and Pyrimidines
Source: MDPI journal article supplement (doi:10.3390/metabo12010068), 2022-01-12
Supplement: s1 [file s1]

*Supplements to*  
**Evaluating the accuracy of the QCEIMS approach for computational prediction of  
electron ionization mass spectra of purines and pyrimidines**

Jesi Lee<sup>1,2</sup>, Tobias Kind<sup>2</sup>, Dean Tantillo<sup>1</sup>, Lee-Ping Wang<sup>1</sup>, Oliver Fiehn<sup>2\*</sup>

<sup>1</sup> Department of Chemistry, University of California, Davis

<sup>2</sup> West Coast Metabolomics Center, University of California, Davis

**Supplement 1:** Computational costs for QCEIMS prediction of 80 purines and pyrimidines.

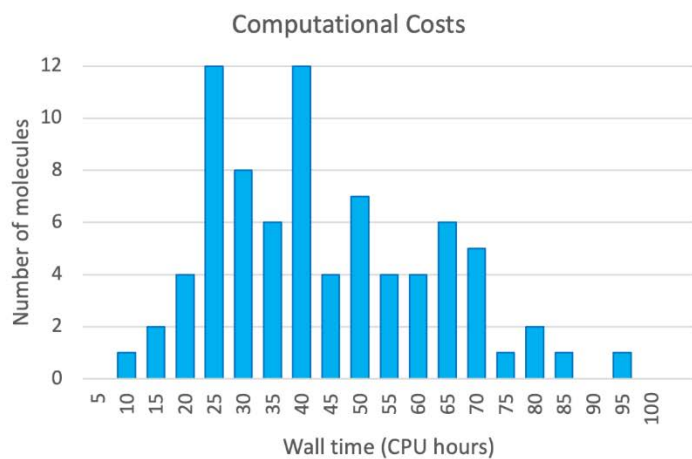

| Types of molecules    | Num. of mols | Total time | Avg. time |
|-----------------------|--------------|------------|-----------|
| Pyrimidines           | 14           | 468.90     | 33.49     |
| Methylpurines         | 4            | 183.30     | 45.83     |
| Amino/hydroxy-purines | 5            | 185.19     | 37.04     |
| Adenines              | 5            | 183.51     | 36.70     |
| Xanthines             | 8            | 246.43     | 30.80     |
| Hypoxanthines         | 3            | 94.64      | 31.55     |
| Guanines              | 6            | 264.43     | 44.07     |
| Lumazines             | 8            | 339.48     | 42.44     |
| Quinazdine-diones     | 7            | 444.57     | 63.51     |
| Reumycins             | 7            | 298.52     | 42.65     |
| Pyridopyrimidines     | 13           | 583.61     | 54.02     |
| others                | 7            | 259.47     | 37.07     |
|                       |              | 3292.59    | 41.16     |

**Supplement 2:** Exact masses, formulas, number of fragment ions ('peaks') in QCEIMS mass spectra and comparison to NIST17 targets with Wdot and cosine scores, and the matching rank when querying the overall NIST17 library.

|                        | Num | EXACT MASS | Formula       | NAME                                                 | SYNONYMS                                                                                                                                                                                                                                                                                                                                                                                                       | PEAK #'s | Wdot   | cos   | Rank |
|------------------------|-----|------------|---------------|------------------------------------------------------|----------------------------------------------------------------------------------------------------------------------------------------------------------------------------------------------------------------------------------------------------------------------------------------------------------------------------------------------------------------------------------------------------------------|----------|--------|-------|------|
| Group 1<br>Pyrimidines | 2   | 126.042927 | C5H4N2O<br>2  | Thymine                                              | 2,4(1H,3H)-Pyrimidinedione, 5-methyl-<br>Thymin<br>2,4-Dihydroxy-5-methylpyrimidine<br>5-Methyluracil<br>5-Methyl-2,4-dioxypyrimidine<br>5-Methyl-2,4(1H,3H)-pyrimidinedione                                                                                                                                                                                                                                   | 62       | 963.1  | 750.3 | 1    |
|                        | 3   | 126.042927 | C5H4N2O<br>2  | 6-Methyluracil                                       | 2,4(1H,3H)-Pyrimidinedione, 6-methyl-<br>2(1H)-Pyrimidinone, 4-hydroxy-6-methyl-<br>Pseudothymine<br>Uracil, 6-methyl-<br>2,4-Dihydroxy-6-methylpyrimidine<br>2,4-Pyrimidinediol, 6-methyl-<br>AWD 23-15<br>6-Methyl-1H-pyrimidine-2,4-dione<br>4,6-Methyluracil                                                                                                                                               | 62       | 978.94 | 916.9 | 1    |
|                        | 5   | 126.042927 | C5H5N2O<br>2  | Uracil, 1-methyl-                                    | 1-Methyluracil<br>2,4(1H,3H)-Pyrimidinedione, 1-methyl-<br>1-Methyl-2,4(1H,3H)-pyrimidinedione #                                                                                                                                                                                                                                                                                                               | 54       | 925.32 | 586.1 | 7    |
|                        | 6   | 127.038177 | C4H3N3O<br>2  | 2,4(1H,3H)-<br>Pyrimidinedione,<br>5-amino-          | Uracil, 5-amino-<br>2,4-Dihydroxy-5-aminopyrimidine<br>5-Amino-2,4-dihydroxy pyrimidine<br>5-Aminouracil<br>5-Amino-2,4(1H,3H)-pyrimidinedione #                                                                                                                                                                                                                                                               | 51       | 983.56 | 909.6 | 2    |
|                        | 7   | 127.038177 | C4H3N3O<br>2  | 4-Amino-2,6-<br>dihydroxypyrimidi<br>ne              | 6-Amino-2,4-dihydroxypyrimidine<br>6-Aminouracil<br>4-Aminouracil<br>2,4(1H,3H)-Pyrimidinedione, 6-amino-<br>Cytosine, 6-hydroxy-<br>Uracil, 6-amino-<br>4-Amino-2,6-dihydroxypyrimidine<br>4-Amino-2,6-dioxypyrimidine<br>4-Amino-2,6-oxypyrimidinediol<br>2,4(1H,3H)-Pyrimidinedione, 5-fluoro-<br>Fluorouracil<br>Uracil, 5-fluoro-<br>Efudex<br>Fluoroplex<br>Fluracil<br>Fluril<br>NSC 19893<br>Ro 2-2757 | 69       | 983.92 | 877.2 | 5    |
|                        | 8   | 130.017856 | C4HFN2O<br>2  | 5-Fluorouracil                                       | Uracil, 5-fluoro-<br>Efudex<br>Fluoroplex<br>Fluracil<br>Fluril<br>NSC 19893<br>Ro 2-2757                                                                                                                                                                                                                                                                                                                      | 67       | 979.41 | 937.6 | 1    |
|                        | 16  | 140.058578 | C6H7N2O<br>2  | 2,4(1H,3H)-<br>Pyrimidinedione,<br>3,6-dimethyl-     | Uracil, 3,6-dimethyl-<br>3,6-Dimethyl-2,4(1H,3H)-pyrimidinedione<br>3,6-Dimethyluracil                                                                                                                                                                                                                                                                                                                         | 22       | 168.5  | 718.9 | 1    |
|                        | 17  | 140.058578 | C6H8N2O<br>2  | 2,4(1H,3H)-<br>Pyrimidinedione,<br>1,3-dimethyl-     | Uracil, 1,3-dimethyl-<br>N,N-Dimethyluracil<br>N1,N3-Dimethyluracil<br>1,3-Dimethyluracil<br>2,4-Dihydroxy-1,3-dimethylpyrimidine<br>1,3-Dimethyl-2,4(1H,3H)-pyrimidinedione #                                                                                                                                                                                                                                 | 54       | 971.41 | 872.6 | 1    |
|                        | 18  | 140.058578 | C6H6N2O<br>2  | 2,4-Dihydroxy-5,6-<br>dimethylpyrimidin<br>e         | 5,6-Dimethyluracil<br>2,4(1H,3H)-Pyrimidinedione, 5,6-dimethyl-<br>Uracil, 5,6-dimethyl-<br>4,5-Dimethyluracil<br>5,6-Dimethyl-2,4(1H,3H)-pyrimidinedione #                                                                                                                                                                                                                                                    | 74       | 944.6  | 896.3 | 1    |
|                        | 19  | 141.053826 | C5H6N3O<br>2  | 2,4(1H,3H)-<br>Pyrimidinedione,<br>6-amino-1-methyl- | 6-Amino-1-methyl-1H-pyrimidine-2,4-dione<br>6-Amino-1-methyl-2,4(1H,3H)-pyrimidinedione<br>#<br>6-Amino-1-methyluracil                                                                                                                                                                                                                                                                                         | 45       | 236.98 | 377.1 | 4    |
|                        | 41  | 154.074227 | C7H10N2<br>O2 | 2,4(1H,3H)-<br>Pyrimidinedione,<br>1,3,5-trimethyl-  | Uracil, 1,3,5-trimethyl-<br>1,3-Dimethylthymine<br>1,3,5-Trimethyl-2,4(1H,3H)-pyrimidinedione #                                                                                                                                                                                                                                                                                                                | 79       | 939.83 | 744.6 | 1    |

|                                  | Num | EXACT MASS | Formula   | NAME                                         | SYNONYMS                                                                                                                                                                                                                             | PEAK #'s | Wdot   | cos   | Rank |
|----------------------------------|-----|------------|-----------|----------------------------------------------|--------------------------------------------------------------------------------------------------------------------------------------------------------------------------------------------------------------------------------------|----------|--------|-------|------|
|                                  | 42  | 154.074227 | C7H10N2O2 | 2,4(1H,3H)-Pyrimidinedione, 1,3,6-trimethyl- | Uracil, 1,3,6-trimethyl-1,3,6-Trimethyl-2,4(1H,3H)-pyrimidinedione 1,3,6-Trimethyluracil                                                                                                                                             | 66       | 943.55 | 668.7 | 2    |
|                                  | 43  | 155.069476 | C6H9N3O2  | 6-Amino-1,3-dimethyluracil                   | 4-Amino-1,3-dimethyl-2,6-dihydroxypyrimidine 4-Amino-1,3-dimethyluracil 2,4(1H,3H)-Pyrimidinedione, 6-amino-1,3-dimethyl- Uracil, 6-amino-1,3-dimethyl-1,3-Dimethyl-6-amino-uracil 6-Amino-1,3-dimethyl-2,4(1H,3H)-pyrimidinedione # | 59       | 955.28 | 763.2 | 1    |
|                                  | 81  | 170.080376 | C6H10N4O2 | 5,6-Diamino-1,3-dimethyluracil               | 2,4(1H,3H)-Pyrimidinedione, 5,6-diamino-1,3-dimethyl- Uracil, 5,6-diamino-1,3-dimethyl-4,5-Diamino-1,3-dimethyluracil 5,6-Diamino-1,3-dimethyl-2,4(1H,3H)-pyrimidinedione #                                                          | 127      | 958.09 | 586.5 | 48   |
| Group 2<br>Methylpurines         | 1   | 120.043596 | C5H3N4    | 9H-Purine                                    | 7H-Purine 1H-Purine Purine .beta.-Purine Isopurine 3,5,7-Triazaindole 6H-Imidazo[4,5-d]pyrimidine Imidazo(4,5-d)pyrimidine NSC 753                                                                                                   | 21       | 338.64 | 383.2 | 2    |
|                                  | 9   | 134.059246 | C6H5N4    | 1H-Purine, 2-methyl-                         | Purine, 2-methyl- 2-Methyl-9H-purine #                                                                                                                                                                                               | 45       | 957.27 | 936.5 | 2    |
|                                  | 10  | 134.059246 | C6H5N4    | 1H-Purine, 6-methyl-                         | Purine, 6-methyl- 6-Methylpurine 6-Methyl-1H-purine 6-Methyl-9H-purine #                                                                                                                                                             | 22       | 120.76 | 174.6 | 5    |
|                                  | 11  | 134.059246 | C6H5N4    | 1H-Purine, 8-methyl-                         | Purine, 8-methyl- 8-Methylpurine 8-Methyl-7H-purine #                                                                                                                                                                                | 53       | 950.07 | 757.3 | 4    |
| Group 3<br>Amino/hydroxy-purines | 13  | 135.054495 | C5H4N5    | 2-Aminopurine                                | 1H-Purin-2-amine Purine, 2-amino- SQ 22,451 SQ 22451 9H-Purin-2-amine #                                                                                                                                                              | 35       | 139.71 | 219.6 | 1    |
|                                  | 14  | 136.038510 | C5H3N4O   | 2-Purinol                                    | 9H-Purin-2-ol #                                                                                                                                                                                                                      | 69       | 874.17 | 843.8 | 15   |
|                                  | 15  | 136.038510 | C5H3N4O   | 1H-Purin-6-ol                                | Imidazo[5,4-d]pyrimidine, 6-hydroxy-                                                                                                                                                                                                 | 45       | 956.11 | 959.4 | 5    |
|                                  | 22  | 145.038845 | C6H2N5    | 1H-Purine-6-carbonitrile                     | 6-Cyanopurine Purine-6-carbonitrile Purine, 6-cyano- 9H-Purine-6-carbonitrile #                                                                                                                                                      | 9        | 73.029 | 98.2  | 1    |

|                      | Num | EXACT MASS | Formula  | NAME                         | SYNONYMS                                                                                                                                                                                                                                                      | PEAK #'s | Wdot   | cos   | Rank |
|----------------------|-----|------------|----------|------------------------------|---------------------------------------------------------------------------------------------------------------------------------------------------------------------------------------------------------------------------------------------------------------|----------|--------|-------|------|
|                      | 69  | 167.044325 | C5H4N5O2 | 2-Amino-6,8-dihydroxypurine  | 1H-Purine-6,8-dione, 2-amino-7,9-dihydro-2-Amino-9H-purine-6,8-diol #                                                                                                                                                                                         | 117      | 962.34 | 846.3 | 2    |
| Group 4<br>Adenines  | 12  | 135.054495 | C5H4N5   | Adenine                      | GFFGJBXGBJISGV-UHFFFAOYSA-N                                                                                                                                                                                                                                   | 2        | 940.27 | 939.2 | 32   |
|                      | 25  | 149.070146 | C6H7N5   | 6-Amino-3-methylpurine       | FSASIHFSFGAIJM-UHFFFAOYSA-N                                                                                                                                                                                                                                   | 2        | 923.7  | 796.3 | 1    |
|                      | 26  | 149.070146 | C6H7N5   | 7H-Purin-6-amine, 7-methyl-  | HCGHYQLFMPXSDU-UHFFFAOYSA-N                                                                                                                                                                                                                                   | 2        | 820.27 | 560.2 | 2    |
|                      | 27  | 149.070146 | C6H7N5   | 6-Amino-1-methylpurine       | HPZMWTNATZPBIH-UHFFFAOYSA-N                                                                                                                                                                                                                                   | 2        | 932.23 | 907.8 | 4    |
|                      | 32  | 150.065394 | C5H5N6   | 2,6-Diaminopurine            | MSSXOMSJDRHRC-UHFFFAOYSA-N                                                                                                                                                                                                                                    | 2        | 116.74 | 100.5 | N/R  |
| Group 5<br>Xanthines | 37  | 152.033425 | C5H3N4O2 | Xanthine                     | 1H-Purine-2,6-dione, 3,7-dihydro-Isloxanthine<br>Pseudoxanthine<br>Purine-2,6(1H,3H)-dione<br>Xan<br>Xanthic oxide<br>Xanthin<br>1H-Purine-2,6-diol<br><del>2,6-Dioxo-1,2,3,6-tetrahydro-purine</del>                                                         | 43       | 949    | 658.7 | 9    |
|                      | 39  | 153.028674 | C4N5O2   | 8-Azaxanthine                | 1H-1,2,3-Triazolo[4,5-d]pyrimidine-5,7(4H,6H)-dione<br>v-Triazolo(4,5-d)pyrimidine-5,7-diol<br>NSC 756<br>USAF cb-26<br>Xanthazol<br>1H-v-Triazolo(4,5-d)pyrimidine-5,7(4H,6H)-dione<br><del>2,6-Dioxo-8-azapurine</del>                                      | 68       | 967.05 | 687.1 | 1    |
|                      | 66  | 166.049075 | C6H4N4O2 | 2,6-Dihydroxy-7-methylpurine | 7-Methylxanthine<br>1H-Purine-2,6-dione, 3,7-dihydro-7-methyl-Heteroxanthin<br>Heteroxanthine<br>Xanthine, 7-methyl-<br>7-Methylxanthin                                                                                                                       | 31       | 943.54 | 913.7 | 1    |
|                      | 75  | 168.028340 | C5N4O3   | Uric acid                    | 1H-Purine-2,6,8(3H)-trione, 7,9-dihydro-Lithic acid<br>Purine-2,6,8(1H,3H,9H)-trione<br>1H-Purine-2,6,8-triol<br>2,6,8-Trioxopurine<br>2,6,8-Trioxypurine<br>7,9-Dihydro-1H-purine-2,6,8(3H)-trione<br>2,6,8-Trihydroxypurine<br><del>8-Hydroxyxanthine</del> | 139      | 786.88 | 457.4 | 6    |
|                      | 99  | 180.064726 | C7H7N4O2 | Theobromine                  | 1H-Purine-2,6-dione, 3,7-dihydro-3,7-dimethyl-Diurobromine<br>Santheose<br>SC 15090<br>Teobromin<br>Theosavose<br>Theostene<br>Thesal<br><del>3,7-Dimethylxanthine</del>                                                                                      | 49       | 949.83 | 762.8 | 1    |

|                          | Num | EXACT MASS | Formula      | NAME                                                              | SYNONYMS                                                                                                                                                                                                                            | PEAK #'s | Wdot   | cos   | Rank |
|--------------------------|-----|------------|--------------|-------------------------------------------------------------------|-------------------------------------------------------------------------------------------------------------------------------------------------------------------------------------------------------------------------------------|----------|--------|-------|------|
|                          | 100 | 180.064726 | C7H7N4O<br>2 | Theophylline                                                      | 1H-Purine-2,6-dione, 3,7-dihydro-1,3-dimethyl-<br>Elixophyllin<br>Elixophylline<br>Lanophyllin<br>Liquophyllin<br>Optiphyllin<br>Parkophyllin<br>Pseudotheophylline<br>Solosin                                                      | 48       | 953.5  | 732.5 | 1    |
|                          | 106 | 181.059975 | C6H6N5O<br>2 | 3H-N-Triazolo(4,5-d)pyrimidine-5,7(4H,6H)-dione, 3,6-dimethyl-    | 1,9-Dimethyl-8-azaxanthin<br>3,6-Dimethyl-3H-v-triazolo(4,5-d)pyrimidine-5,7(4H,6H)-dione                                                                                                                                           | 32       | 87.83  | 578.9 | 1    |
|                          | 132 | 195.075624 | C7H9N5O<br>2 | 3H-v-Triazolo(4,5-d)pyrimidine-5,7(4H,6H)-dione, 3,4,6-trimethyl- | 1,3,9-Trimethyl-8-azaxanthin<br>3,4,6-Trimethyl-3H-v-triazolo(4,5-d)pyrimidine                                                                                                                                                      | 38       | 254.35 | 515.5 | 2    |
| Group 6<br>Hypoxanthines | 28  | 150.054161 | C6H5N4O      | 6H-Purin-6-one, 1,7-dihydro-7-methyl-                             | Hypoxanthine, 7-methyl-<br>7-Methylhypoxanthine<br>7-Methyl-6-hydroxypurine<br>7-Methyl-1,7-dihydro-6H-purin-6-one #                                                                                                                | 33       | 104.06 | 132.3 | N/R  |
|                          | 31  | 150.054161 | C6H5N4O      | 6H-Purin-6-one, 3,7-dihydro-3-methyl-                             | Hypoxanthine, 3-methyl-<br>N3-Methylhypoxanthine<br>3-Methylhypoxanthine<br>3-Methyl-3,7-dihydro-6H-purin-6-one #                                                                                                                   | 22       | 207.38 | 543.6 | 1    |
|                          | 52  | 164.069811 | C7H8N4O      | 6H-Purin-6-one, 1,7-dihydro-1,7-dimethyl-                         | Hypoxanthine, 1,7-dimethyl-<br>1,7-Dimethylhypoxanthine<br>1,7-Dimethyl-1,7-dihydro-6H-purin-6-one #                                                                                                                                | 75       | 891.87 | 870.3 | 1    |
| Group 7<br>Guanines      | 35  | 151.049410 | C5H3N5O      | Guanine                                                           | 6H-Purin-6-one, 2-amino-1,7-dihydro-<br>C.I. Natural White 1<br>C.I. 75170<br>Dew Pearl<br>Guanin<br>Guanine enol<br>Hypoxanthine, 2-amino-<br>Mearlmaid<br>Natural Pearl Essence                                                   | 84       | 937.61 | 912.8 | 2    |
|                          | 53  | 165.065060 | C6H6N5O      | 7-Methylguanine                                                   | 6H-Purin-6-one, 2-amino-1,7-dihydro-7-methyl-<br>Guanine, 7-methyl-<br>N7-Methylguanine<br>2-Amino-7-methylhypoxanthine<br>2-Amino-1,7-dihydro-7-methyl-6H-purin-6-one<br>2-Amino-7-methyl-1,7-dihydro-6H-purin-6-one<br>NSC 193444 | 38       | 127.23 | 381.7 | 2    |
|                          | 54  | 165.065060 | C6H6N5O      | 6H-Purin-6-one, 2-amino-1,7-dihydro-1-methyl-                     | Guanine, 1-methyl-<br>N1-Methylguanine<br>1-Methylguanine<br>2-Amino-1-methyl-1,7-dihydro-6H-purin-6-one #                                                                                                                          | 30       | 166.66 | 423.5 | 1    |
|                          | 55  | 165.065060 | C6H6N5O      | 2-Amino-6-hydroxy-9-methylpurine                                  | 9-Methylguanine<br>6H-Purin-6-one, 2-amino-1,9-dihydro-9-methyl-<br>2-Amino-9-methyl-1,9-dihydro-6H-purin-6-one #                                                                                                                   | 100      | 937.71 | 940   | 1    |
|                          | 56  | 165.065060 | C6H6N5O      | 6H-Purin-6-one, 2-amino-3,7-dihydro-3-methyl-                     | Guanine, 3-methyl-<br>N3-Methylguanine<br>3-Methylguanine<br>2-Amino-3-methyl-3,7-dihydro-6H-purin-6-one #                                                                                                                          | 48       | 230.74 | 518.6 | 1    |

|                      | Num | EXACT MASS | Formula      | NAME                                            | SYNONYMS                                                                                                                                                                                                                                 | PEAK #'s | Wdot   | cos   | Rank |
|----------------------|-----|------------|--------------|-------------------------------------------------|------------------------------------------------------------------------------------------------------------------------------------------------------------------------------------------------------------------------------------------|----------|--------|-------|------|
|                      | 124 | 193.059975 | C7H5N5O<br>2 | Acetamide, N-(6,7-dihydro-6-oxo-1H-purin-2-yl)- | N-2-Acetylguanine<br>N-(6-Oxo-6,9-dihydro-1H-purin-2-yl)acetamide #                                                                                                                                                                      | 67       | 708.08 | 348.7 | N/R  |
| Group 8<br>Lumazines | 51  | 164.033425 | C6H2N4O<br>2 | Lumazine                                        | 2,4(1H,3H)-Pteridinedione<br>2,4(3H,8H)-Pteridinedione<br>2,4-Dihydroxypteridine<br>2,4-Pteridinediol<br>Lumazin<br>Pteridinedione, 2,4(1h,3h)-                                                                                          | 92       | 951.94 | 896.2 | 1    |
|                      | 65  | 166.049075 | C6H4N4O<br>2 | 7,8-Dihydro-2,4(1H,3H)-pteridinedione           |                                                                                                                                                                                                                                          | 75       | 15.729 | 47.38 | N/R  |
|                      | 88  | 178.049075 | C7H5N4O<br>2 | 2,4(1H,3H)-Pteridinedione, 8-methyl-            | Lumazine, 8-methyl-<br>8-Methyl-2,4(3H,8H)-pteridinedione #                                                                                                                                                                              | 47       | 215.83 | 589.2 | 1    |
|                      | 91  | 178.049075 | C7H4N4O<br>2 | 2,4(1H,3H)-Pteridinedione, 6-methyl-            | Lumazine, 6-methyl-<br>6-Methyl-2,4(1H,3H)-pteridinedione #                                                                                                                                                                              | 17       | 156.79 | 313.5 | 27   |
|                      | 95  | 180.028340 | C6HN4O3      | 2,4,7(1H,3H,8H)-Pteridinetrione                 | Isoxantholumazine<br>Lumazine, 7-hydroxy-<br>Violapterin<br>2,4,7-Trihydroxypteridine<br>7-Hydroxylumazine<br>2,4,7-Pteridinetriol                                                                                                       | 83       | 909.86 | 615.5 | 8    |
|                      | 96  | 180.028340 | C6HN4O3      | 2,4,6(3H)-Pteridinetrione, 1,5-dihydro-         | Lumazine, 6-hydroxy-<br>Pteridine-2,4,6-trione<br>2,4,6(1H,3H,5H)-Pteridinetrione<br>2,4,6-Pteridinetriol<br>2,4,6-Trihydroxypteridine<br>6-Hydroxylumazine<br>1,5-Dihydro-2,4,6(3H)-pteridinetrione #                                   | 23       | 52.832 | 135.5 | N/R  |
|                      | 121 | 192.064726 | C8H8N4O<br>2 | 2,4(1H,3H)-Pteridinedione, 1,3-dimethyl-        | Lumazine, 1,3-dimethyl-<br>1,3-Dimethylumazine<br>1,3-Dimethylpteridine-2,4-dione<br>N,N'-Dimethylumazin<br>1,3-Dimethyl-2,4(1H,3H)-pteridinedione #<br>N,N'-Dimethylumazine                                                             | 61       | 941.32 | 786.3 | 1    |
|                      | 128 | 194.043990 | C7H3N4O<br>3 | 2,4,7(1H,3H,8H)-Pteridinetrione, 6-methyl-      | 2,4,7-Pteridinetriol, 6-methyl-<br>2,4(1H,3H)-Pteridinedione, 7-hydroxy-6-methyl-<br>6-Methyl-2,4,7(1H,3H,8H)-quinazolinetrione #                                                                                                        | 46       | 818.57 | 533.3 | N/R  |
|                      | 46  | 162.042928 | C8H4N2O<br>2 | 2,4(1H,3H)-Quinazolinodione                     | Benzouracil<br>Benzoyleneurea<br>Quinazoline-2,4-dione<br>Quinazolinodione<br>Urea, benzoylene-<br>1,2,3,4-Tetrahydroquinazoline-2,4-dione<br>2,4-Dihydroxyquinazoline<br>(1H,3H)Quinazoline dione-2,4<br>2,4-Dioxotetrahydroquinazoline | 75       | 953.38 | 846.8 | 9    |
|                      | 83  | 176.058578 | C9H7N2O<br>2 | 2,4(1H,3H)-Quinazolinodione, 3-methyl-          | 3-Methyl-2,4(1H,3H)-quinazolinodione                                                                                                                                                                                                     | 69       | 951.15 | 817.6 | 1    |

|                               | Num | EXACT MASS | Formula        | NAME                                                                        | SYNONYMS                                                                                                                                                                                                                                                                                                                                                                                                                                                                    | PEAK #'s | Wdot   | cos   | Rank |
|-------------------------------|-----|------------|----------------|-----------------------------------------------------------------------------|-----------------------------------------------------------------------------------------------------------------------------------------------------------------------------------------------------------------------------------------------------------------------------------------------------------------------------------------------------------------------------------------------------------------------------------------------------------------------------|----------|--------|-------|------|
| Group 9<br>Quinazoline-diones | 84  | 176.058578 | C9H7N2O<br>2   | 2,4(1H,3H)-<br>Quinazolidione,<br>1-methyl-                                 | Glycosmicine<br>1-Methyl-2,4(1H,3H)-Quinazolidione<br>Methyl-1 (1H,3H)quinazolidione-2,4                                                                                                                                                                                                                                                                                                                                                                                    | 41       | 299.94 | 429.5 | 29   |
|                               | 86  | 177.053826 | C8H6N3O<br>2   | 3-Amino-1H-<br>quinazoline-2,4-<br>dione                                    |                                                                                                                                                                                                                                                                                                                                                                                                                                                                             | 60       | 233.5  | 298.9 | N/R  |
|                               | 87  | 177.053826 | C8H5N3O<br>2   | 6-Amino-1H-<br>quinazoline-2,4-<br>dione                                    |                                                                                                                                                                                                                                                                                                                                                                                                                                                                             | 35       | 968.56 | 972.5 | 1    |
|                               | 115 | 190.074227 | C10H10N<br>2O2 | 1,3-Dimethyl-<br>2,4(1H,3H)-<br>quinazolidione                              | 2,4(1H,3H)-Quinazolidione, 1,3-dimethyl-<br>Dimethyl-1,3 (1H,3H)quinazolidione-2,4<br>1,3-Dimethyl-1,2,3,4-tetrahydroquinazolin-2,4-<br>dione                                                                                                                                                                                                                                                                                                                               | 76       | 931.74 | 835.7 | 1    |
|                               | 120 | 192.053493 | C9H8N2O<br>3   | 2,4(1H,3H)-<br>Quinazolidione,<br>3-hydroxy-1-<br>methyl-                   | 3-Hydroxy-1-methyl-2,4(1H,3H)-<br>quinazolidione #                                                                                                                                                                                                                                                                                                                                                                                                                          | 20       | 294.24 | 366   | N/R  |
| Group 10<br>Reumycins         | 92  | 179.044325 | C6H4N5O<br>2   | Reumycin                                                                    | Pyrimido(5,4-e)-as-triazine-5,7(6H,8H)-dione, 6-<br>methyl-<br>Reumitsin<br>Rheumygin<br>Pyrimido(5,4-e)-as-triazine-5,7(1H,6H)-dione, 6-<br>methyl-<br>BA 51-090492<br>6-Methylpyrimido(5,4-e)-as-triazine-5,7(1H,6H)-<br>dione                                                                                                                                                                                                                                            | 32       | 534.26 | 451.3 | 30   |
|                               | 105 | 181.023589 | C5HN5O3        | Pyrimido[4,5-<br>e][1,2,4]triazine-<br>6,8(5H,7H)-dione,<br>3-hydroxy-      |                                                                                                                                                                                                                                                                                                                                                                                                                                                                             | 115      | 606.67 | 505.9 | N/R  |
|                               | 123 | 193.059975 | C7H7N5O<br>2   | 5,7-<br>Dimethylpyrimido<br>[4,5-E]-1,2,4-<br>triazine-<br>6,8(5H,7H)-dione |                                                                                                                                                                                                                                                                                                                                                                                                                                                                             | 30       | 920.23 | 954   | 1    |
|                               | 125 | 193.059975 | C7H7N5O<br>2   | Fervenuin                                                                   | Compd. 7215<br>Fervenuline<br>FH-3582-A<br>KC 1017<br>Planomycin<br>Pyrimido(5,4-e)-as-triazine-5,7(6H,8H)-dione,<br>6,8-dimethyl-<br>Pyrimido(5,4-e)-1,2,4-triazine-5,7(6H,8H)-dione,<br>6,8-dimethyl-<br>Pyrimido(5,4-e)-as-triazine-5,7(1H,6H)-dione,<br>1,6-dimethyl-<br>Pyrimido(5,4-e)-1,2,4-triazine-5,7(1H,6H)-dione,<br>1,6-dimethyl-<br>Toxoflavine<br>Xanthotricin<br>Xanthotricin<br>1,6-Dimethyl-5,7-dioxo-1,5,6,7-<br>tetrahydroxypyrimido(5,4-e)-as-triazine | 39       | 317.18 | 391.7 | 71   |
|                               | 126 | 193.059975 | C7H7N5O<br>2   | Toxoflavin                                                                  | 8-Aminoteoflavin<br>8-Aminothephyllyne<br>1H-Purine-2,6-dione, 8-amino-3,7-dihydro-1,3-<br>dimethyl-<br>7H-Purine-2,6(1H,3H)-dione, 8-amino-1,3-<br>dimethyl-<br>8-Amino-1,3-dimethyl-3,7-dihydro-1H-purine-<br>2,6-dione #                                                                                                                                                                                                                                                 | 31       | 224.79 | 355.5 | 6    |
|                               | 133 | 195.075624 | C7H8N5O<br>2   | Theophylline, 8-<br>amino-                                                  |                                                                                                                                                                                                                                                                                                                                                                                                                                                                             | 134      | 971.05 | 825.9 | 1    |



|                               | Num | EXACT MASS | Formula      | NAME                                                            | SYNONYMS                                                                  | PEAK #'s | Wdot   | cos   | Rank |
|-------------------------------|-----|------------|--------------|-----------------------------------------------------------------|---------------------------------------------------------------------------|----------|--------|-------|------|
| Group 11<br>Pyridopyrimidines | 47  | 163.038177 | C7H3N3O<br>2 | Pyrido[3,2-d]pyrimidine-2,4(1H,3H)-dione                        | Pyrido[3,2-d]pyrimidine-2,4-diol<br>2,4-Dihydroxy pyrido[3,2-d]pyrimidine | 24       | 249.32 | 761   | 1    |
|                               | 48  | 163.038177 | C7H3N3O<br>2 | Pyrido[2,3-d]pyrimidine-2,4(1H,3H)-dione                        |                                                                           | 18       | 233.69 | 415.4 | 1    |
|                               | 50  | 163.038177 | C7H3N3O<br>2 | Pyrido[4,3-d]pyrimidine-2,4(1H,3H)-dione                        | Pyrido[4,3-d]pyrimidin-4(3H)-one, 2-hydroxy-                              | 37       | 939.71 | 757.7 | 11   |
|                               | 116 | 191.069476 | C9H9N3O<br>2 | Pyrido[2,3-d]pyrimidine-2,4(1H,3H)-dione, 1,3-dimethyl-         | 1,3-Dimethylpyrido[2,3-d]pyrimidine-2,4(1H,3H)-dione #                    | 28       | 169.72 | 295.1 | N/R  |
|                               | 117 | 191.069476 | C9H9N3O<br>2 | Pyrido[3,2-d]pyrimidine-2,4(1H,3H)-dione, 1,3-dimethyl-         | 1,3-Dimethylpyrido[3,2-d]pyrimidine-2,4(1H,3H)-dione #                    | 29       | 302.24 | 696   | 3    |
|                               | 118 | 191.069476 | C9H9N3O<br>2 | Pyrido[3,4-d]pyrimidine-2,4(1H,3H)-dione, 1,3-dimethyl-         | 1,3-Dimethylpyrido[3,4-d]pyrimidine-2,4(1H,3H)-dione #                    | 32       | 262.9  | 569.7 | 1    |
| Group 12<br>Others            | 38  | 152.058578 | C7H6N2O<br>2 | 1H,3H,5H,6H,7H-Cyclopenta[d]pyrimidine-2,4-dione                |                                                                           | 64       | 935.12 | 842.9 | N/R  |
|                               | 70  | 167.044325 | C5H3N5O<br>2 | 4-Methyl-3,4-dihydro-[1,2,3]triazolo[4,5-d]pyrimidine-5,7-dione |                                                                           | 39       | 347.9  | 46.95 | N/R  |
|                               | 74  | 168.017107 | C6H2N2O<br>4 | 1,5-Dihydrofuro[3,4-d]pyrimidine-2,4,7(3H)-trione               |                                                                           | 47       | 932.84 | 586.8 | 26   |
|                               | 80  | 170.007605 | C4N4O4       | 1-Oxy-4H-[1,2,5]oxadiazolo[3,4-d]pyrimidine-5,7-dione           |                                                                           | 33       | 935.41 | 561.2 | 1    |



|  | Num | EXACT MASS | Formula      | NAME                                                              | SYNONYMS                                                                                                                                                                                                                                               | PEAK #'s | Wdot   | cos   | Rank |
|--|-----|------------|--------------|-------------------------------------------------------------------|--------------------------------------------------------------------------------------------------------------------------------------------------------------------------------------------------------------------------------------------------------|----------|--------|-------|------|
|  | 93  | 179.069476 | C8H8N3O<br>2 | 1H-Pyrrolo(2,3-d)pyrimidine-2,4(3H,7H)-dione, 1,3-dimethyl-       | 1,3-Dimethyl-1H-pyrrolo(2,3-d)pyrimidine-2,4(3H,7H)-dione<br>1H-Pyrrolo(2,3-d)pyrimidine-2,4(3H,7H)-dione, 1,3-dimethyl-<br>1H-Pyrrolo(3,2-d)pyrimidine-5,7(4H,6H)-dione, 4,6-dimethyl-<br>1H-Pyrrolo(3,2-d)pyrimidine-2,4(3H,5H)-dione, 1,3-dimethyl- | 79       | 885.54 | 488.4 | 1    |
|  | 122 | 192.064726 | C8H6N4O<br>2 | 1H-Pyrrolo[2,1-f]purine-2,4(3H,6H)-dione, 7,8-dihydro-            |                                                                                                                                                                                                                                                        | 95       | 934.63 | 503.5 | 1    |
|  | 146 | 207.075624 | C8H9N5O<br>2 | Pyrimido[5,4-E][1,2,4]triazine-5,7(1H,6H)-dione, 1,3,6-trimethyl- |                                                                                                                                                                                                                                                        | 86       | 911.02 | 310.8 | 45   |

**Supplement 3:** The ability of QCEIMS to predict major fragment ions with abundance >20% of the base peak ion, distinguished by 12 subclasses of purines and pyrimidines. *Note:* Most major fragment ions were correctly predicted by QCEIMS for most structure subclasses. While QCEIMS predicted less than 20% of additional fragment ions not verified by experimental spectra, more than 40% extra fragment ions were predicted by QCEIMS of methylpurines.

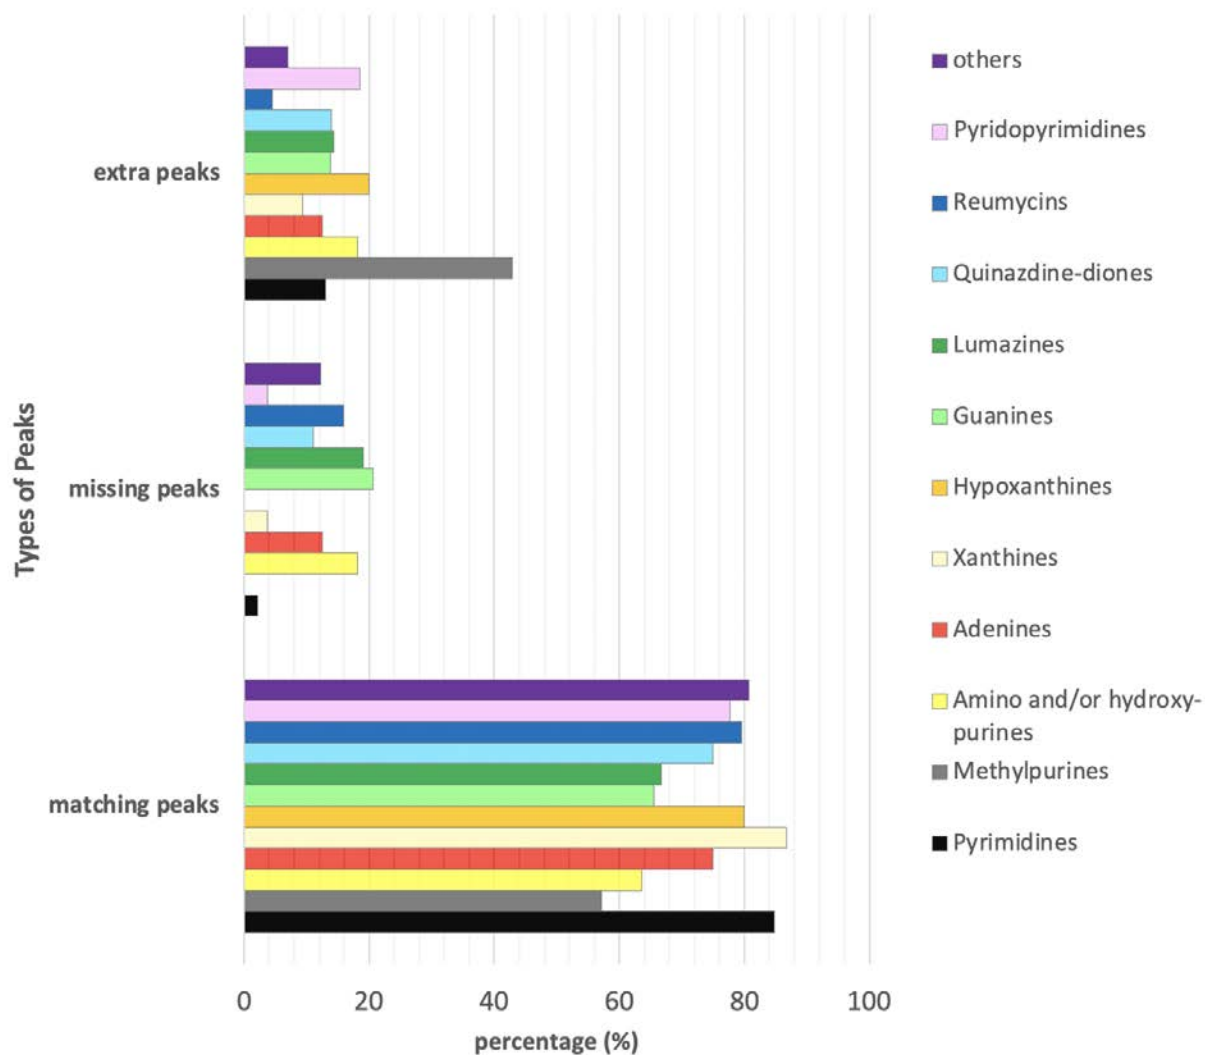

**Supplement 4:** 32 examples of QCEIMS predicted mass spectra (top) versus NIST17 experimental mass spectra (bottom) for purines and pyrimidines.

**(P1) 6-methyluracil**

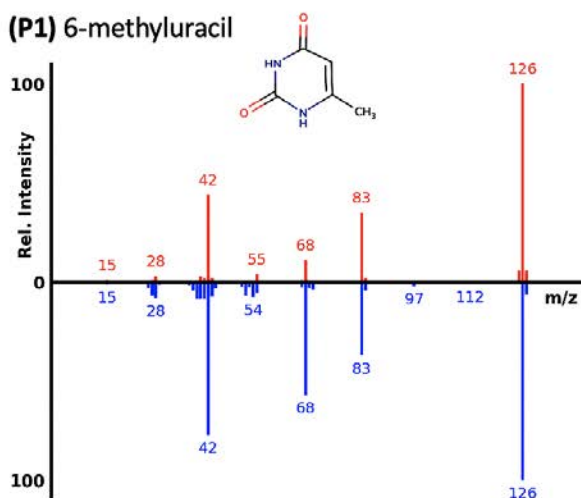

**(P2) 1-methyluracil**

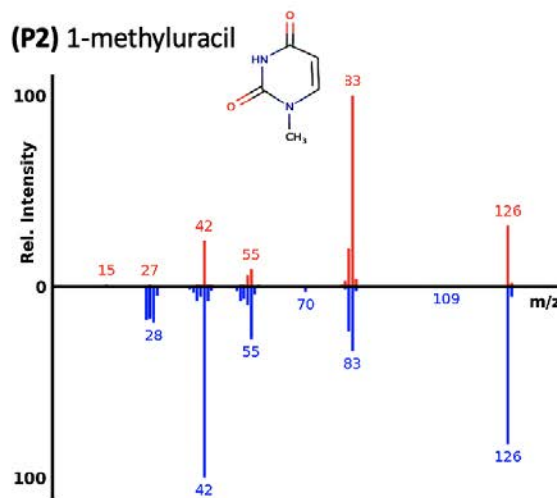

**(P3) 5-aminouracil**

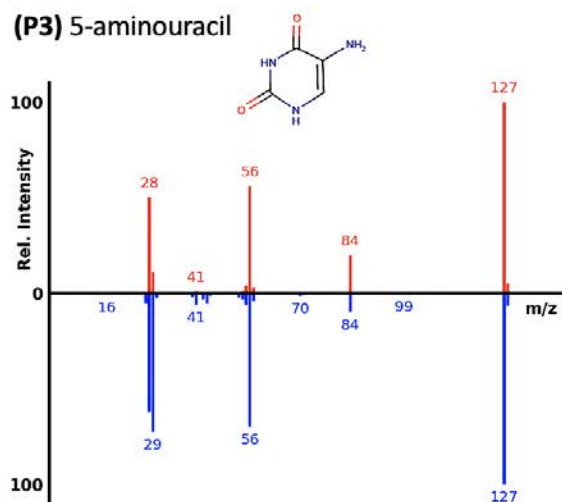

**(P4) 5-fluorouracil**

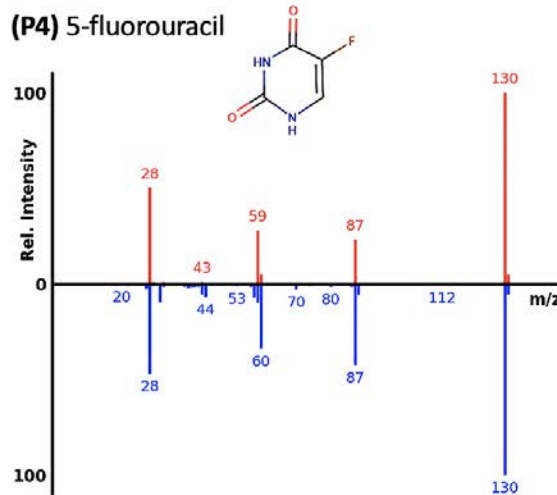

(P5) 3,6-dimethyluracil

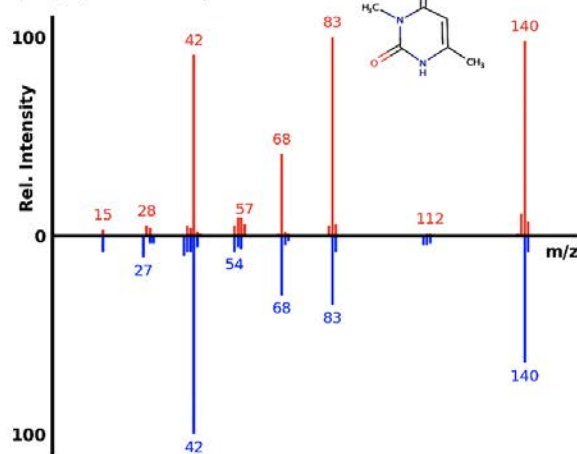

(P6) 1,3-dimethyluracil

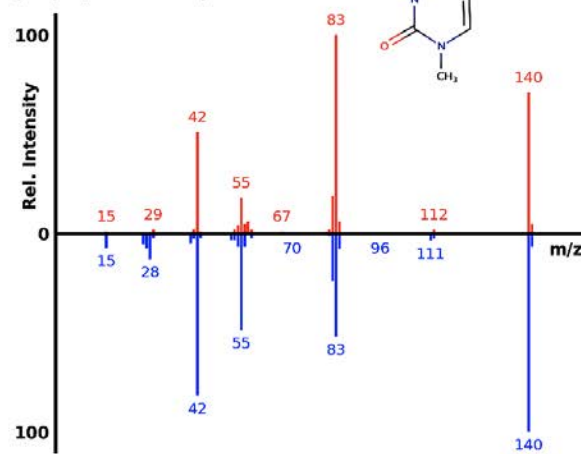

(P7) 6-amino-1-methyluracil

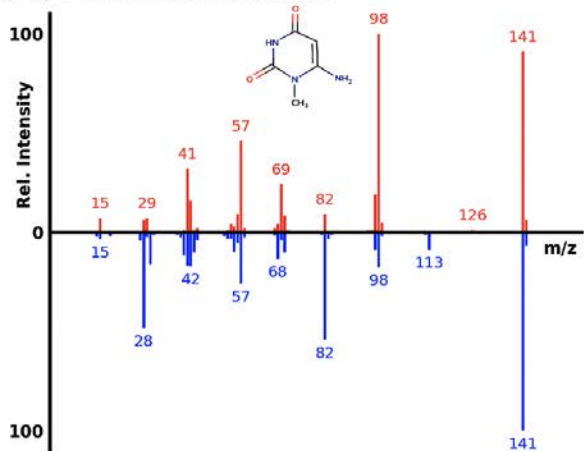

(X1) Xanthine

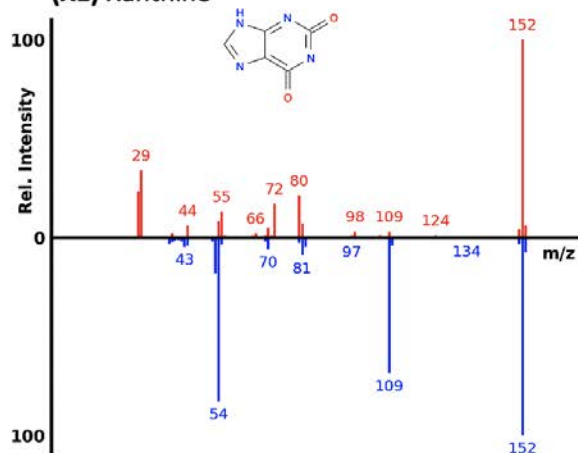

(X2) 8-azaxanthine

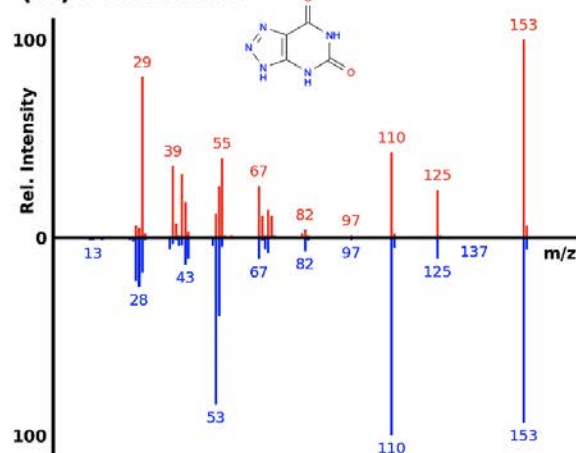

(X3) 7-methylxanthine

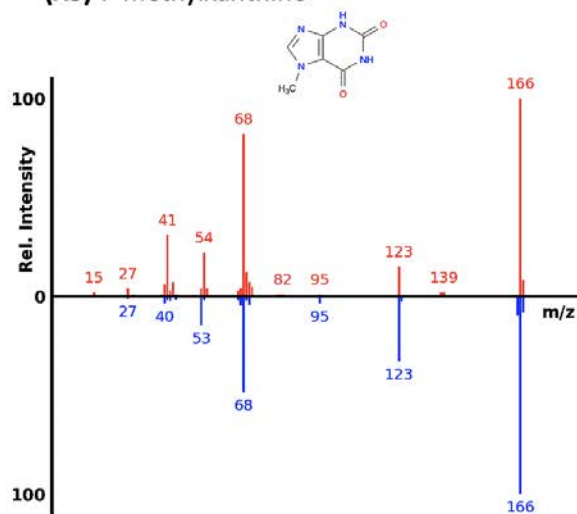

(X4) Uric acid (8-hydroxyxanthine)

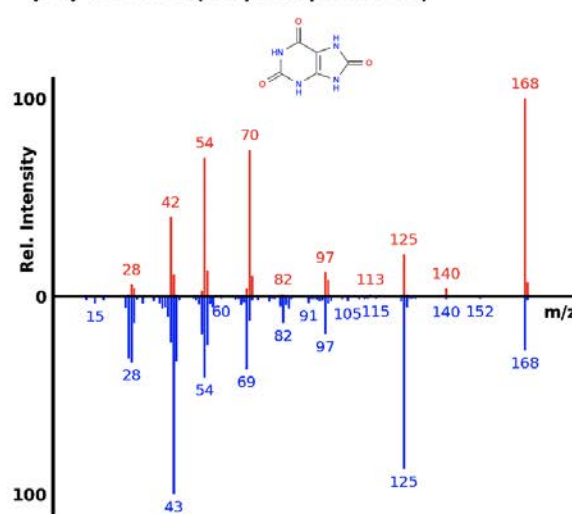

(X5) 3,7-dimethylxanthine

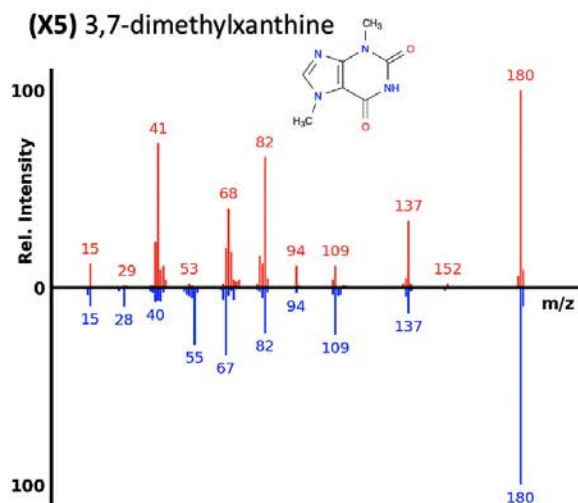

(X6) 1,3-dimethylxanthine

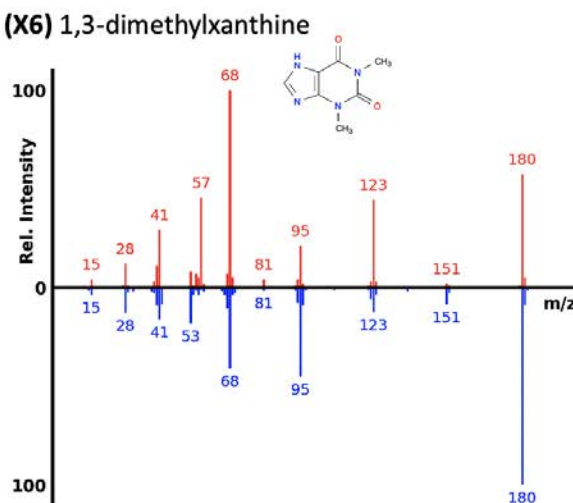

(X7) 1,9-dimethyl-8-azaxanthine

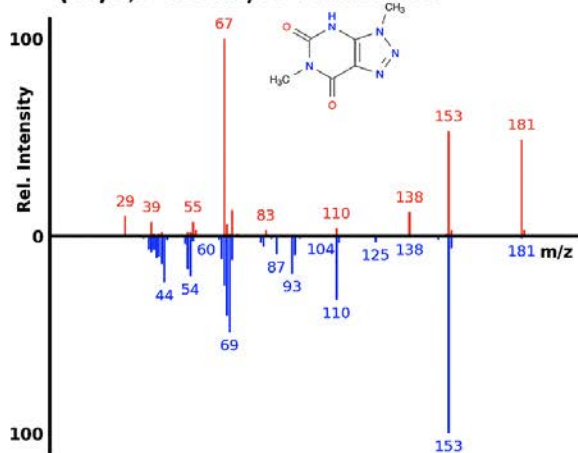

(X8) 1,3,9-trimethyl-8-azaxanthine

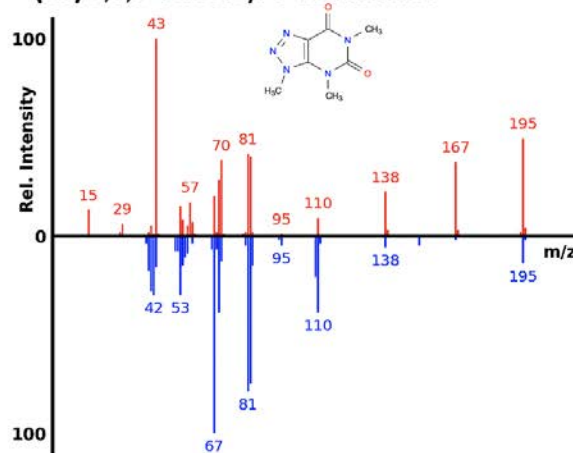

(L1) Lumazine

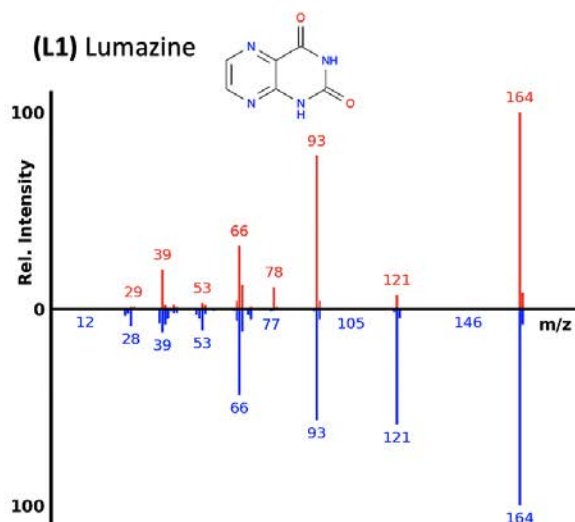

(L2) 7,8-Dihydro-2,4(1H,3H)-pteridinedione

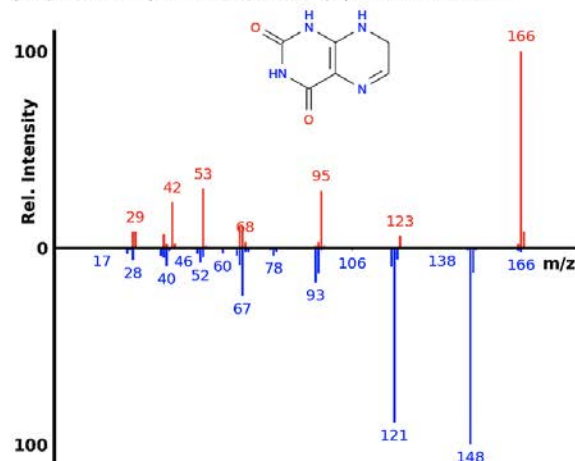

(L3) 8-methyl-lumazine

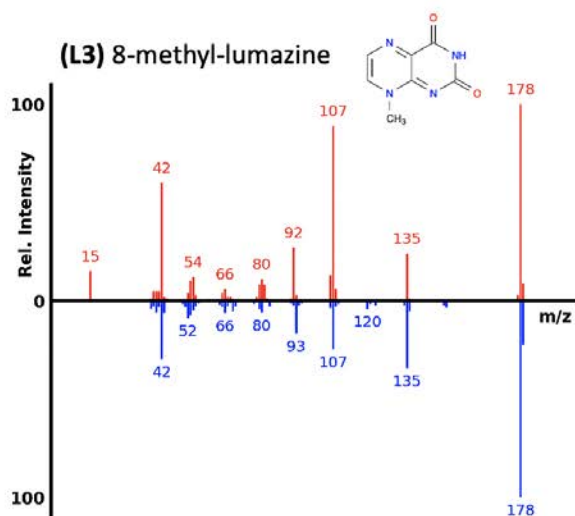

(L4) 6-methyl-lumazine

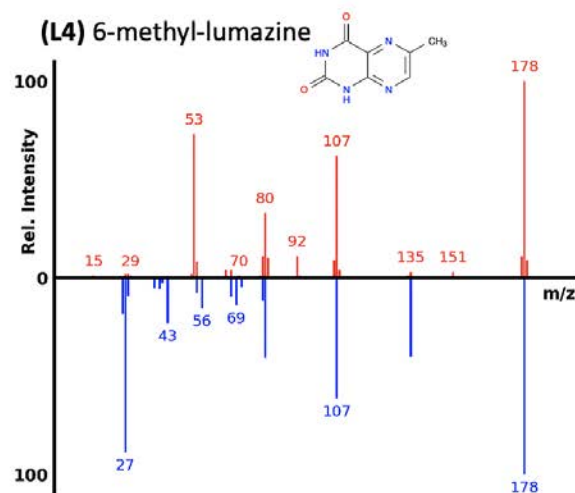



(L5) 7-hydroxy-lumazine

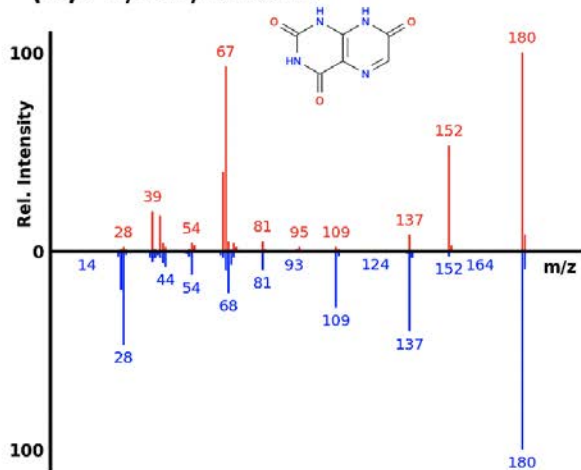

(L6) 6-hydroxy-lumazine

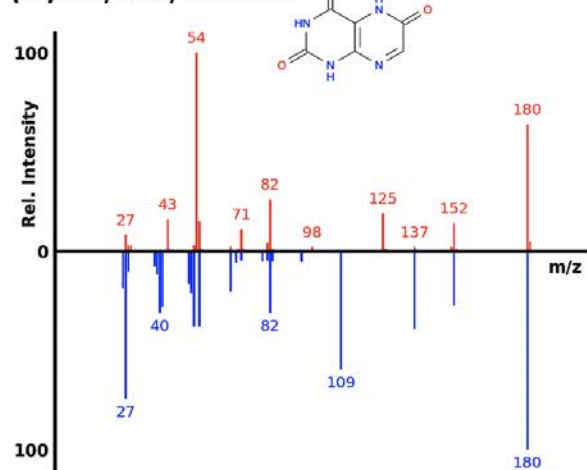

(L7) 1,3-dimethyl-lumazine

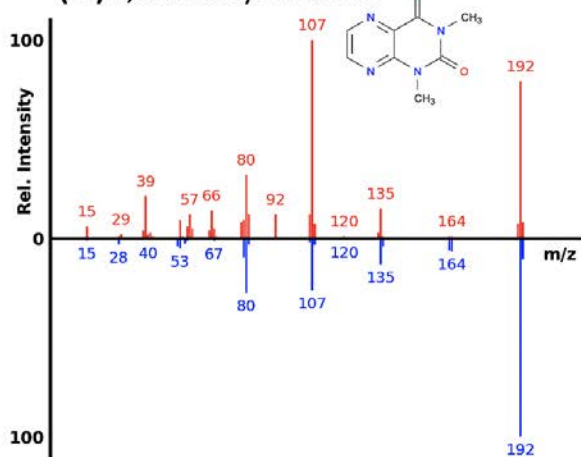

(L8) 6-methyl-2,4,7-Pteridinetriol

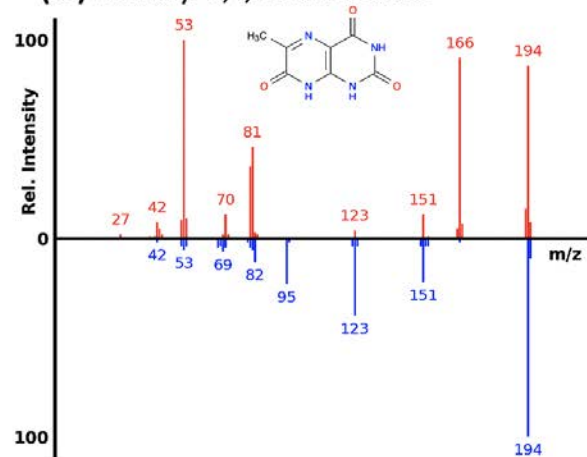

(HX1) Hypoxanthine

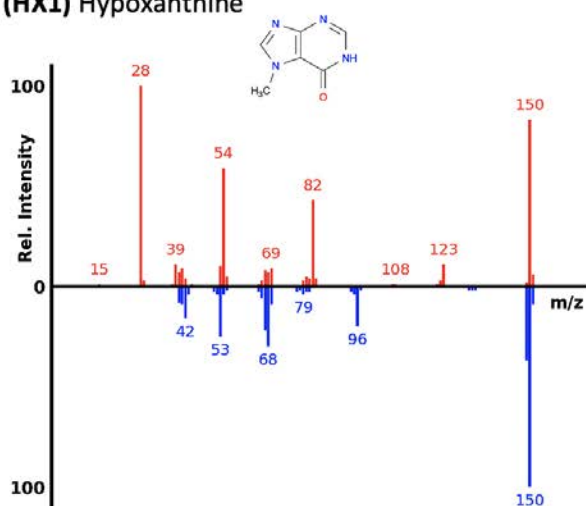

(HX2) 3-methylhypoxanthine

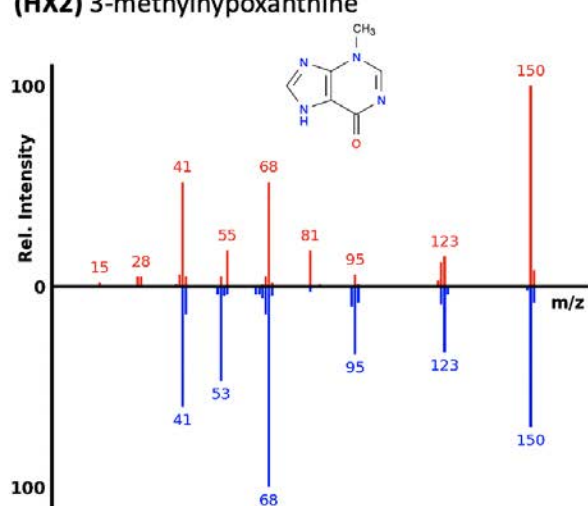

(HX3) 1,7-dimethylhypoxanthine

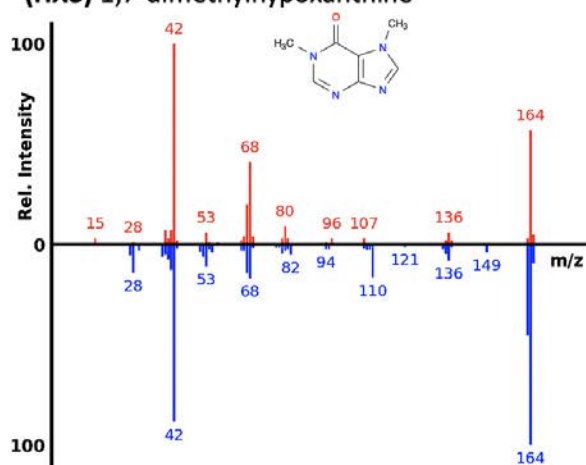

(G1) Guanine

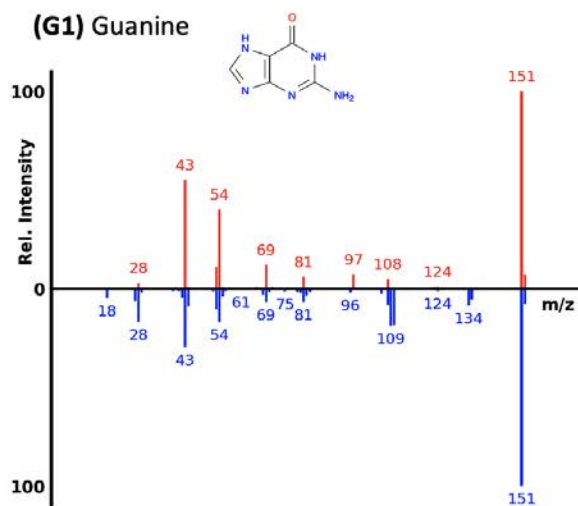

(G2) 7-methyl-guanine

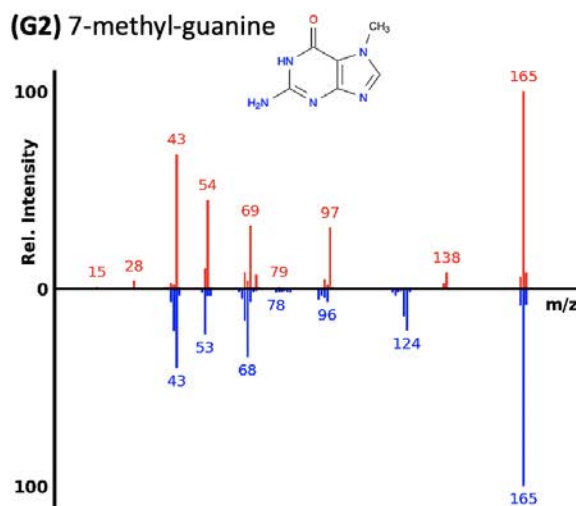

(G3) 1-methyl-guanine

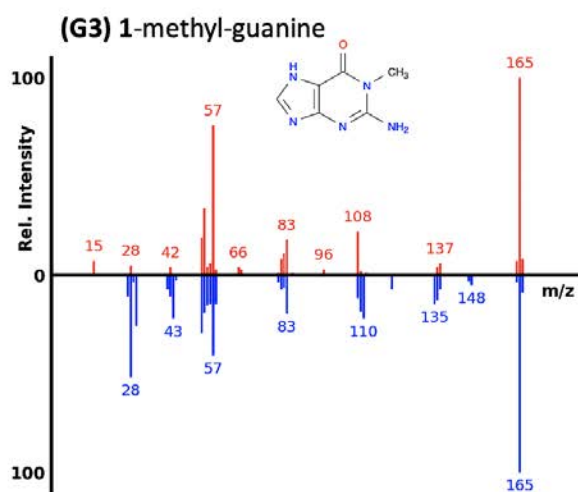

(G4) 9-methyl-guanine

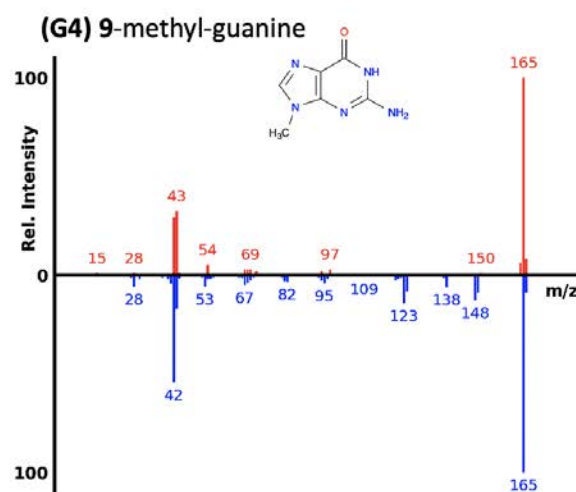

(G5) 3-methyl-guanine

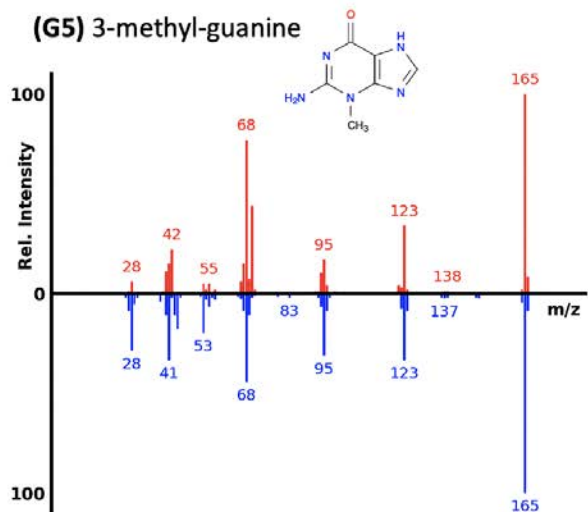

(G6) N-2-Acetylguanine

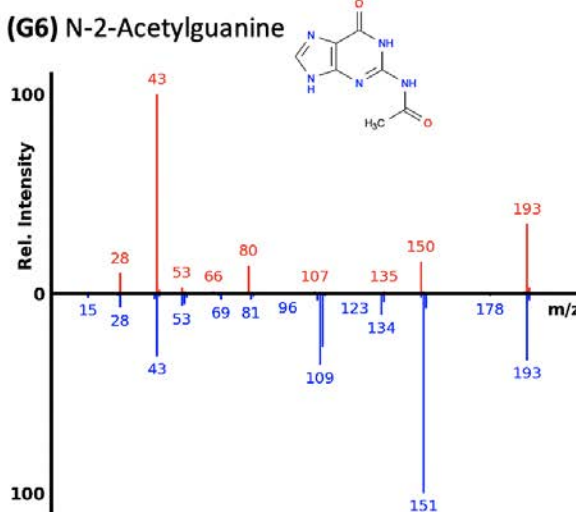

**Supplement 5** Analysis of QCEIMS trajectories marking the neutral loss of isocyanic acid (43 u, pink circle). (a) Benzouracil. (b) Lumazine.

(a)

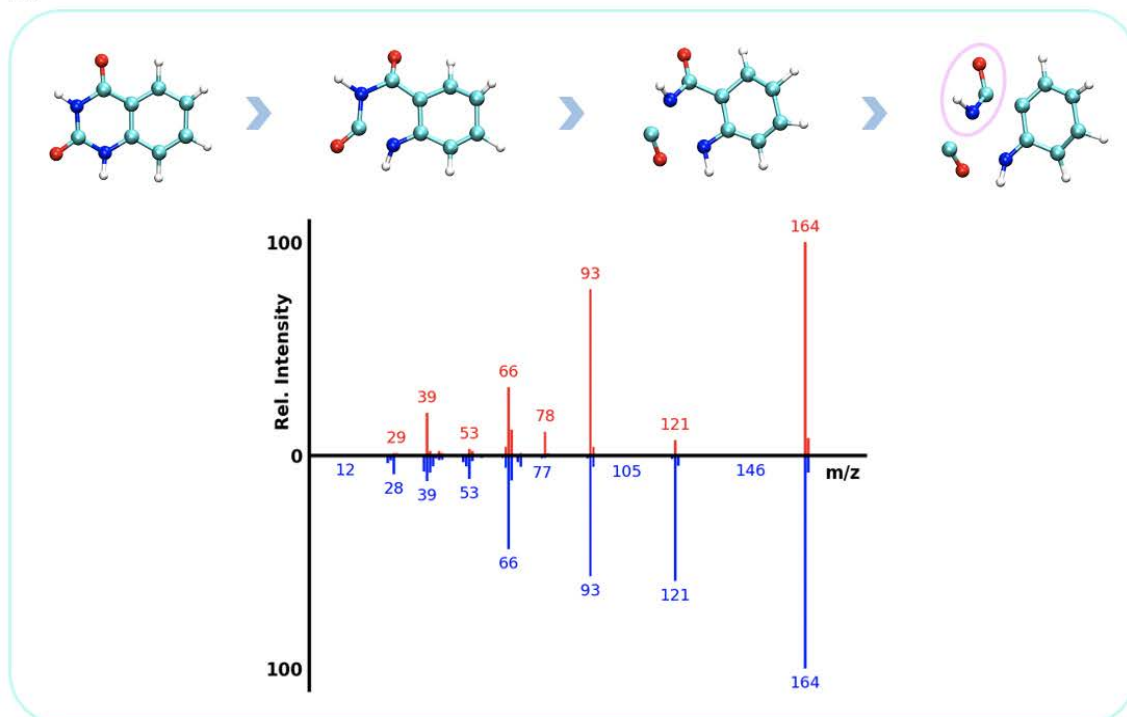

(b)

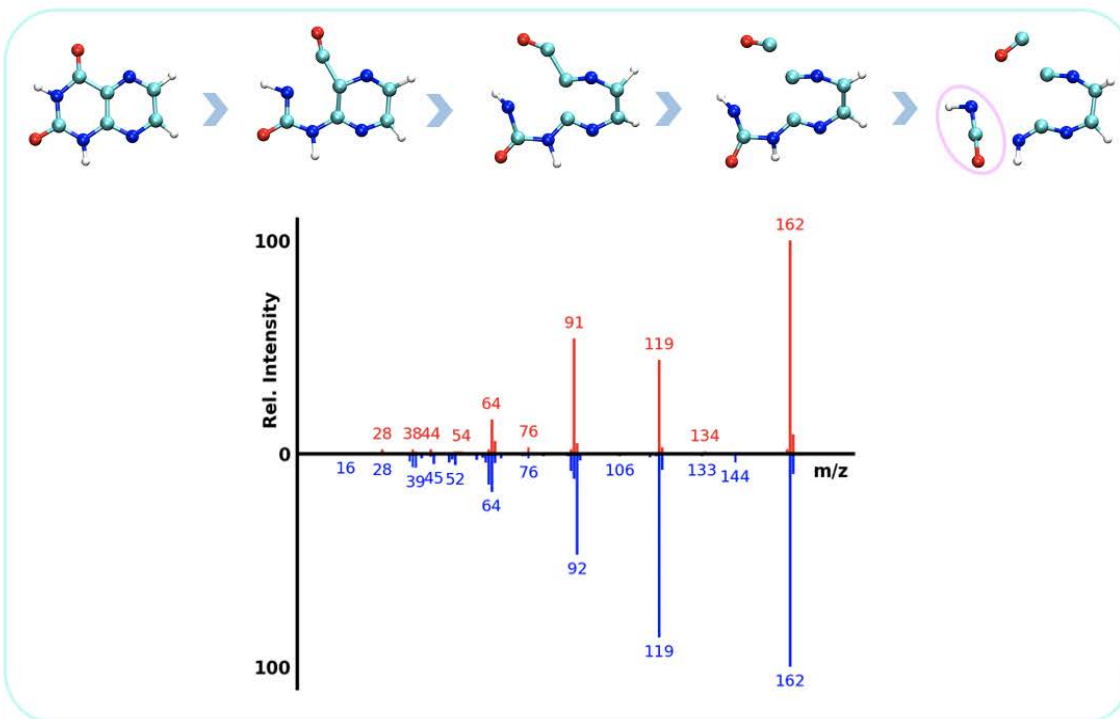

**Supplement 6:** List of molecular structures with the numbers of missing, matching, and extra ions generated by QCEIMS compared to NIST17 experimental mass spectra.

| Pyrimidines    | Mol ID | Structure                                                                           | # of matching peaks | # of missing peaks | # of extra peaks |
|----------------|--------|-------------------------------------------------------------------------------------|---------------------|--------------------|------------------|
|                | 2      |    | 12                  | 7                  | 1                |
|                | 3      |    | 13                  | 11                 | 1                |
|                | 5      |    | 14                  | 7                  | 0                |
|                | 6      |    | 9                   | 6                  | 1                |
|                | 7      |    | 10                  | 12                 | 0                |
|                | 8      |    | 6                   | 6                  | 1                |
|                | 16     |    | 16                  | 4                  | 6                |
|                | 17     |   | 15                  | 6                  | 1                |
|                | 18     |  | 14                  | 13                 | 1                |
|                | 19     |  | 20                  | 6                  | 2                |
|                | 41     |  | 19                  | 6                  | 1                |
|                | 42     |  | 19                  | 10                 | 2                |
|                | 43     |  | 16                  | 7                  | 1                |
|                | 81     |  | 16                  | 22                 | 0                |
| Methylpurines  | 1      |  | 8                   | 4                  | 5                |
|                | 9      |  | 11                  | 1                  | 1                |
|                | 10     |  | 9                   | 6                  | 5                |
| Methyl-purines | 11     |    | 15                  | 3                  | 1                |
|                | 13     |    | 11                  | 7                  | 2                |
|                | 14     |    | 11                  | 13                 | 1                |
|                | 15     |    | 4                   | 6                  | 3                |
|                | 22     |    | 4                   | 0                  | 6                |
|                | 69     |    | 14                  | 17                 | 0                |
|                | 12     |    | 8                   | 7                  | 1                |
|                | 25     |    | 19                  | 5                  | 2                |
|                | 26     |  | 24                  | 3                  | 1                |
|                | 27     |  | 18                  | 16                 | 1                |
|                | 32     |  | 7                   | 4                  | 5                |
|                | 37     |  | 10                  | 5                  | 5                |
|                | 39     |  | 19                  | 2                  | 1                |
|                | 66     |  | 11                  | 2                  | 3                |
|                | 75     |  | 19                  | 24                 | 1                |
| Xanthines      | 99     |  | 24                  | 6                  | 4                |
|                | 100    |  | 21                  | 5                  | 1                |

| Xanthines | Hypoxanthines | Mol ID | Structure | # of matching peaks |
|-----------|---------------|--------|-----------|---------------------|
|           |               |        |           | # of missing peaks  |
| Guanines  |               |        |           | # of extra peaks    |
|           |               |        |           |                     |
| Lumazines |               | 106    |           | 18                  |
|           |               | 132    |           | 19                  |
|           |               | 28     |           | 14                  |
|           |               | 31     |           | 13                  |
|           |               | 52     |           | 21                  |
|           |               | 35     |           | 10                  |
|           |               | 53     |           | 13                  |
|           |               | 54     |           | 17                  |
|           |               | 55     |           | 10                  |
|           |               | 56     |           | 24                  |
|           |               | 124    |           | 7                   |
|           |               | 51     |           | 15                  |
|           |               | 65     |           | 9                   |
|           |               | 88     |           | 23                  |
|           |               | 91     |           | 7                   |
|           |               | 95     |           | 20                  |
|           |               | 96     |           | 10                  |

| Lumazines | Quinazoline-dion | Mol ID | Structure | # of matching peaks |
|-----------|------------------|--------|-----------|---------------------|
|           |                  |        |           | # of missing peaks  |
| Reumycins |                  |        |           | # of extra peaks    |
|           |                  |        |           |                     |
|           |                  | 121    |           | 12                  |
|           |                  | 128    |           | 12                  |
|           |                  | 46     |           | 13                  |
|           |                  | 83     |           | 10                  |
|           |                  | 84     |           | 16                  |
|           |                  | 86     |           | 21                  |
|           |                  | 87     |           | 11                  |
|           |                  | 115    |           | 14                  |
|           |                  | 120    |           | 15                  |
|           |                  | 92     |           | 12                  |
|           |                  | 105    |           | 14                  |
|           |                  | 123    |           | 9                   |
|           |                  | 125    |           | 17                  |
|           |                  | 126    |           | 18                  |
|           |                  | 133    |           | 24                  |
|           |                  | 147    |           | 12                  |
|           |                  | 47     |           | 13                  |

Others 1

Others 1

Others 2

| Mol ID | Structure                                                                           | # of matching peaks | # of missing peaks | # of extra peaks |
|--------|-------------------------------------------------------------------------------------|---------------------|--------------------|------------------|
| 48     |    | 12                  | 3                  | 3                |
| 50     |    | 21                  | 13                 | 5                |
| 116    |    | 19                  | 7                  | 16               |
| 117    |    | 8                   | 1                  | 9                |
| 118    |    | 21                  | 9                  | 6                |
| 38     |    | 20                  | 17                 | 3                |
| 70     |    | 6                   | 3                  | 5                |
| 74     |    | 13                  | 12                 | 3                |
| 80     |   | 11                  | 7                  | 3                |
| 93     |  | 26                  | 14                 | 4                |
| 122    |  | 18                  | 7                  | 3                |
| 146    |  | 28                  | 12                 | 4                |
| Total  |                                                                                     | 1162                | 663                | 269              |
